# Supplementary material
Source: publisher site journal article supplement (https://www.spandidos-publications.com/5018/downloadSupplementary)

Figure S1. Schematic diagram of the present study. ISR, in-stent restenosis; miRNA/miR, microRNA; VSMC, vascular smooth muscle cell; KLF4, Kruppel-like factor 4.

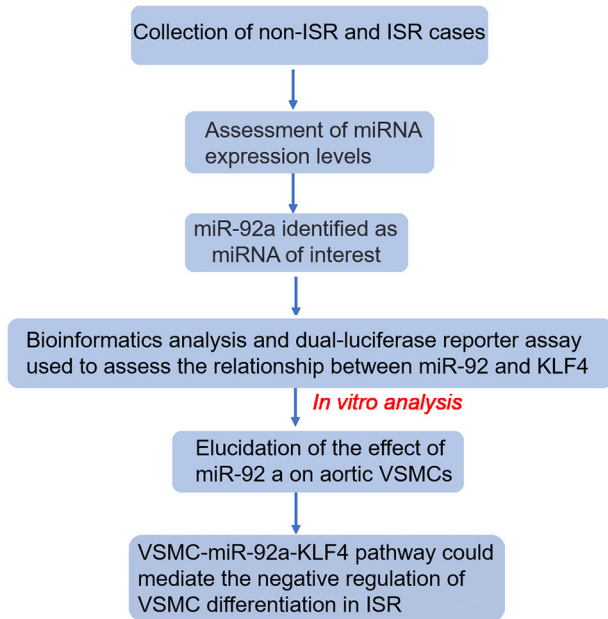

Supplement: Supplementary file 1 [file downloadSupplementary]
